# Supplementary material
Source: HighWire-hosted journal article supplement (http://dmd.aspetjournals.org/highwire/filestream/72570/field_highwire_adjunct_files/0/Supplemental_83642.pdf)

## **Supplemental Data**

### **Prediction of human distribution volumes of compounds in various elimination phases using physiologically based pharmacokinetic modeling and experimental pharmacokinetics in animals**

Hidetoshi Shimizu, Kosuke Yoshida, Tomohisa Nakada, Koki Kojima, Akihito Ogasawara Yoshinobu Nakamaru, and Hiroshi Yamazaki

Drug Metabolism and Disposition

**Supplemental Table 1.** Accuracy of modeled pharmacokinetic profiles in humans after virtual intravenous administrations predicted using distribution volumes obtained using approach 1 (allometric scaling) and PBPK modeling

| Compound    | Prediction method of distribution volumes |               |
|-------------|-------------------------------------------|---------------|
|             | Conventional approach 1                   | PBPK modeling |
| Diazepam    | 0.065                                     | 0.039         |
| Reboxetine  | 0.238                                     | 0.091         |
| Tamsulosin  | 0.118                                     | 0.180         |
| Doxazosin   | 0.296                                     | 0.080         |
| Bosentan    | 0.455                                     | 0.082         |
| Oxprenolol  | 0.028                                     | 0.056         |
| Midazolam   | 0.122                                     | 0.030         |
| Telmisartan | 0.031                                     | 0.047         |
| Diltiazem   | 0.270                                     | 0.121         |
| Raloxifene  | 0.307                                     | 0.132         |
| Average     | 0.193                                     | 0.086         |

Prediction accuracy is shown as the residual sum of squares of observed and modeled plasma concentrations corrected with the number of observed time points (ResSS). ResSS was calculated using the following equation:

$$\sum_i \frac{1}{n} [\log(\text{Obs}_i) - \log(\text{Pred}_i)]^2$$

Obs<sub>*i*</sub> and Pred<sub>*i*</sub> represent observed and predicted concentrations at the *i*<sup>th</sup> time point, respectively.

**Supplemental Fig. 1.** Preclinical concentration-time profile. Data represent mean values from 5 rats and 4 monkeys or dogs. These plasma concentrations were treated in the main analyses.

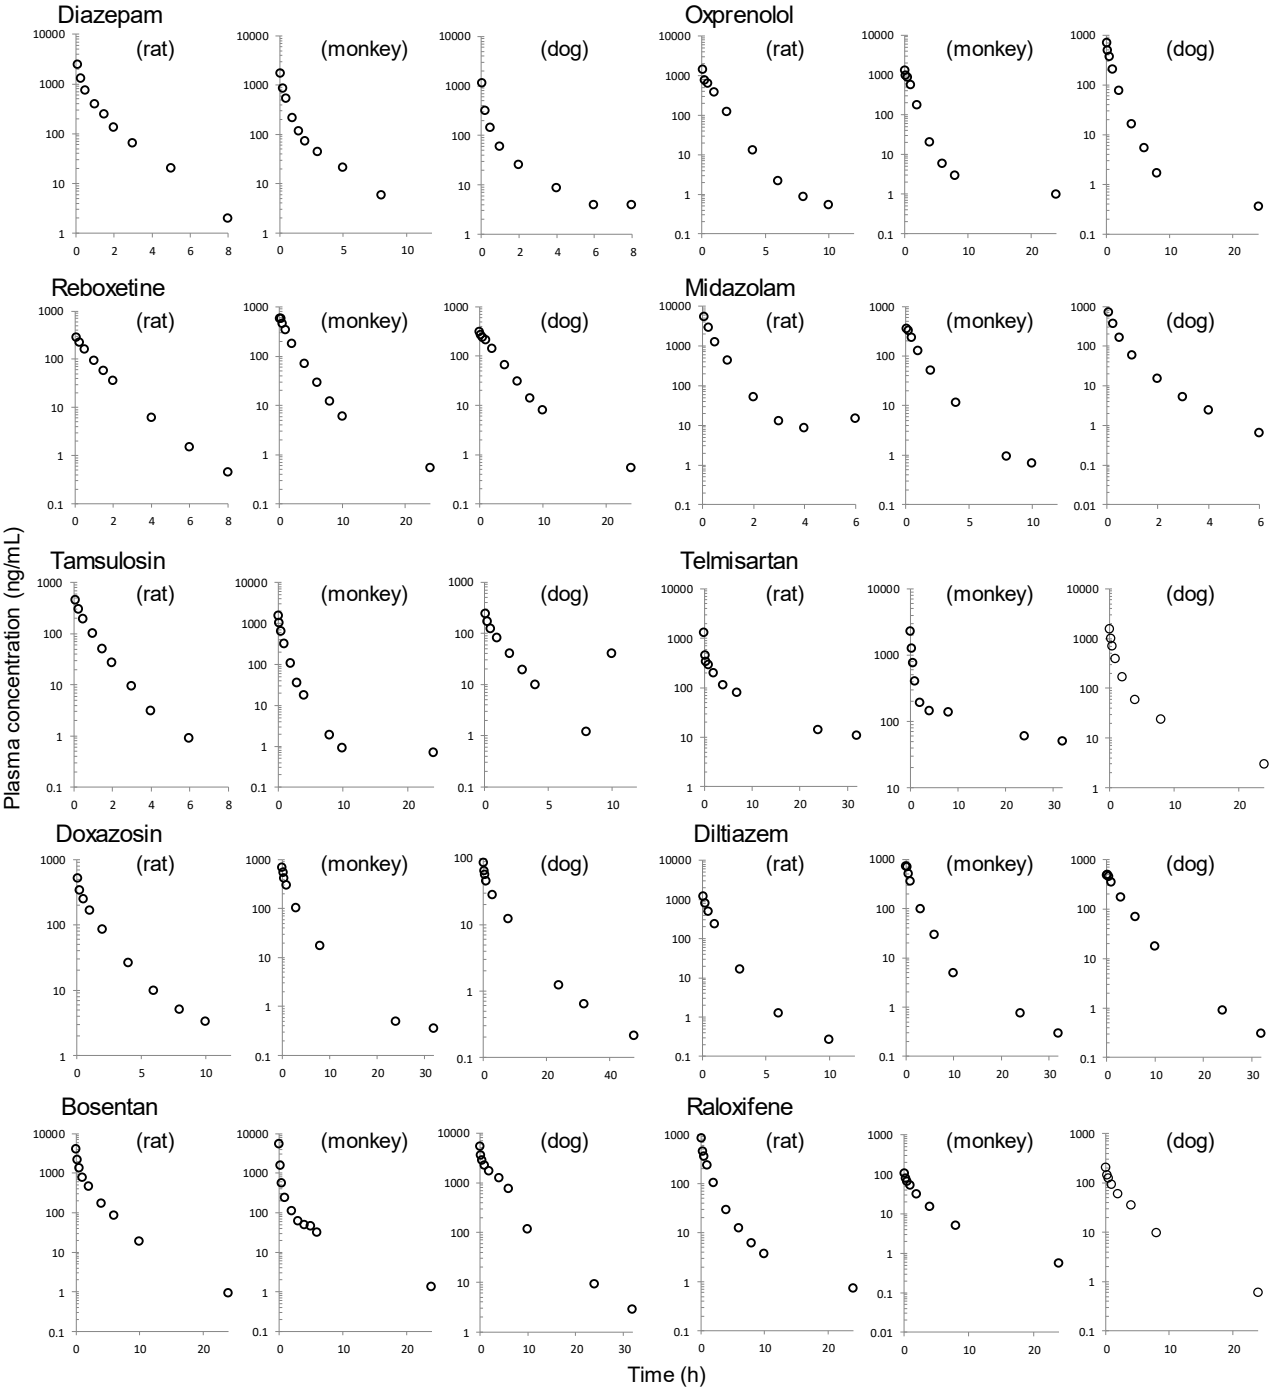

Supplement: Supplemental_83642.pdf [file Supplemental_83642.pdf]
